# Supplementary material
Source: HighWire-hosted journal article supplement (http://cmajopen.ca/highwire/filestream/81225/field_highwire_adjunct_files/2/2018-0108-original-submission.pdf)
Supplement: 2018-0108-original-submission.pdf [file 2018-0108-original-submission.pdf]

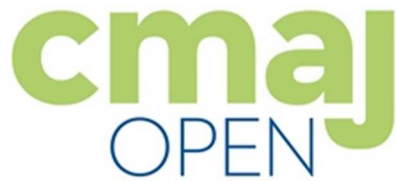

**VARIABLE ACCESS FOR ANTIVIRAL TREATMENT OF  
CHRONIC HEPATITIS B INFECTION IN CANADA: A  
DESCRIPTIVE STUDY**

|                               |                                                                                                                                                                                                                                                                                                                                                                                                                                                                                                                                                                                                                                                                                                                                                                                                                                                                                                                                                                                                                                                                                                                                                                                                                                                                                                                                                                                                                                                                                                                              |
|-------------------------------|------------------------------------------------------------------------------------------------------------------------------------------------------------------------------------------------------------------------------------------------------------------------------------------------------------------------------------------------------------------------------------------------------------------------------------------------------------------------------------------------------------------------------------------------------------------------------------------------------------------------------------------------------------------------------------------------------------------------------------------------------------------------------------------------------------------------------------------------------------------------------------------------------------------------------------------------------------------------------------------------------------------------------------------------------------------------------------------------------------------------------------------------------------------------------------------------------------------------------------------------------------------------------------------------------------------------------------------------------------------------------------------------------------------------------------------------------------------------------------------------------------------------------|
| Journal:                      | <i>CMAJ Open</i>                                                                                                                                                                                                                                                                                                                                                                                                                                                                                                                                                                                                                                                                                                                                                                                                                                                                                                                                                                                                                                                                                                                                                                                                                                                                                                                                                                                                                                                                                                             |
| Manuscript ID                 | CMAJOpen-2018-0108                                                                                                                                                                                                                                                                                                                                                                                                                                                                                                                                                                                                                                                                                                                                                                                                                                                                                                                                                                                                                                                                                                                                                                                                                                                                                                                                                                                                                                                                                                           |
| Manuscript Type:              | Descriptive                                                                                                                                                                                                                                                                                                                                                                                                                                                                                                                                                                                                                                                                                                                                                                                                                                                                                                                                                                                                                                                                                                                                                                                                                                                                                                                                                                                                                                                                                                                  |
| Date Submitted by the Author: | 16-Jul-2018                                                                                                                                                                                                                                                                                                                                                                                                                                                                                                                                                                                                                                                                                                                                                                                                                                                                                                                                                                                                                                                                                                                                                                                                                                                                                                                                                                                                                                                                                                                  |
| Complete List of Authors:     | Congly, Stephen; University of Calgary Cumming School of Medicine, Medicine<br>Brahmania, Mayur; Western University,                                                                                                                                                                                                                                                                                                                                                                                                                                                                                                                                                                                                                                                                                                                                                                                                                                                                                                                                                                                                                                                                                                                                                                                                                                                                                                                                                                                                         |
| Keywords:                     | Health policy, Hepatology, Public health                                                                                                                                                                                                                                                                                                                                                                                                                                                                                                                                                                                                                                                                                                                                                                                                                                                                                                                                                                                                                                                                                                                                                                                                                                                                                                                                                                                                                                                                                     |
| More Detailed Keywords:       | Hepatitis B                                                                                                                                                                                                                                                                                                                                                                                                                                                                                                                                                                                                                                                                                                                                                                                                                                                                                                                                                                                                                                                                                                                                                                                                                                                                                                                                                                                                                                                                                                                  |
| Abstract:                     | <p><b>Background:</b><br/>Antiviral treatment for chronic hepatitis B (CHB) infection can be costly, which presents challenges for universal drug coverage for the estimated 600,000 people living with CHB in Canada. We appraised criteria for reimbursement of CHB antivirals in Canada.</p> <p><b>Methods:</b><br/>We reviewed the reimbursement criteria for lamivudine (LAM), adefovir (ADF), tenofovir (TDF), entecavir (ETV), telbivudine (TBV), pegylated or standard interferon (IFN), and emtricitabine/TDF in the 10 provinces and 3 territories as well as federal programs. Data was extracted from publically available formularies. The primary outcomes extracted were prescriber details, reimbursement regulations and published list price.</p> <p><b>Results:</b><br/>All public insurance programs limit access to antiviral treatment in patients with CHB based on viral characteristics, fibrosis or specialist approval. LAM use is only restricted by BC and Ontario. 43% of programs cover either ETV or TDF with no restriction while the remainder of programs cover these agents if patients have advanced fibrosis/cirrhosis. 64.3% of programs provide coverage of IFN although almost half of these programs only reimburse non-pegylated IFN which is not currently recommended for CHB treatment.</p> <p><b>Interpretation:</b><br/>This descriptive review of criteria for reimbursement of CHB antivirals in Canada showed substantial variability among provinces and territories</p> |

1  
2  
3  
4  
5  
6  
7  
8  
9  
10  
11  
12  
13  
14  
15  
16  
17  
18  
19  
20  
21  
22  
23  
24  
25  
26  
27  
28  
29  
30  
31  
32  
33  
34  
35  
36  
37  
38  
39  
40  
41  
42  
43  
44  
45  
46  
47  
48  
49  
50  
51  
52  
53  
54  
55  
56  
57  
58  
59  
60

|  |                                                                                                                                                                                                                                                                                                           |
|--|-----------------------------------------------------------------------------------------------------------------------------------------------------------------------------------------------------------------------------------------------------------------------------------------------------------|
|  | along with reimbursement criteria not consistent with current practices in the management of CHB. The findings can inform health policy and support the development and adoption of a national CHB strategy to ensure equitable and timely access to treatment no matter where patients reside in Canada. |
|  |                                                                                                                                                                                                                                                                                                           |

SCHOLARONE™  
Manuscripts

Confidential

**STROBE statement – checklist of items, extended from the STROBE statement, that should be reported in observational studies that collect health data.**

|              | Item No. | STROBE items                                                                                                                                                                               | Location in manuscript where items are reported | RECORD items                                                                                                                                                                                                                                                                                                                                                                                                                                | Location in manuscript where items are reported    |
|--------------|----------|--------------------------------------------------------------------------------------------------------------------------------------------------------------------------------------------|-------------------------------------------------|---------------------------------------------------------------------------------------------------------------------------------------------------------------------------------------------------------------------------------------------------------------------------------------------------------------------------------------------------------------------------------------------------------------------------------------------|----------------------------------------------------|
| Abstract     | 1        | (a) Indicate the study's design with a commonly used term in the title or the abstract (b) Provide in the abstract an informative and balanced summary of what was done and what was found | Title                                           | RECORD 1.1: The type of data used should be specified in the title or abstract. When possible, the name of the databases used should be included.<br><br>RECORD 1.2: If applicable, the geographic region and timeframe within which the study took place should be reported in the title or abstract.<br><br>RECORD 1.3: If linkage between databases was conducted for the study, this should be clearly stated in the title or abstract. | Title<br><br>First paragraph<br>Methods<br><br>N/A |
| Introduction | 2        | Explain the scientific background and rationale for the investigation being reported                                                                                                       | Yes                                             | Introduction                                                                                                                                                                                                                                                                                                                                                                                                                                | Page 3                                             |
|              | 3        | State specific objectives, including any prespecified hypotheses                                                                                                                           | Yes                                             | Introduction                                                                                                                                                                                                                                                                                                                                                                                                                                | Page 3                                             |
| Results      | 4        | Present key elements of study design early in the paper                                                                                                                                    | Yes                                             | Abstract and Methods                                                                                                                                                                                                                                                                                                                                                                                                                        | Page 4                                             |
|              | 5        | Describe the setting, locations, and relevant dates, including periods of recruitment, exposure, follow-up, and data collection                                                            | Yes                                             | Methods                                                                                                                                                                                                                                                                                                                                                                                                                                     | Page 4                                             |
| Discussion   | 6        | (a) <i>Cohort study</i> - Give the                                                                                                                                                         | Yes                                             | RECORD 6.1: The methods of study                                                                                                                                                                                                                                                                                                                                                                                                            | Yes, under                                         |

|   |   |                                                                                                                                                                                             |                   |                                                                                                                                                                                                                                            |            |
|---|---|---------------------------------------------------------------------------------------------------------------------------------------------------------------------------------------------|-------------------|--------------------------------------------------------------------------------------------------------------------------------------------------------------------------------------------------------------------------------------------|------------|
| 1 |   | eligibility criteria, and the sources and methods of selection of participants. Describe methods of follow-up                                                                               |                   | population selection (such as codes or algorithms used to identify subjects) should be listed in detail. If this is not possible, an explanation should be provided.                                                                       | participan |
| 2 |   | <i>Case-control study</i> - Give the eligibility criteria, and the sources and methods of case ascertainment and control selection. Give the rationale for the choice of cases and controls |                   | RECORD 6.2: Any validation studies of the codes or algorithms used to select the population should be referenced. If validation was conducted for this study and not published elsewhere, detailed methods and results should be provided. | N/A        |
| 3 |   | <i>Cross-sectional study</i> - Give the eligibility criteria, and the sources and methods of selection of participants                                                                      |                   | RECORD 6.3: If the study involved linkage of databases, consider use of a flow diagram or other graphical display to demonstrate the data linkage process, including the number of individuals with linked data at each stage.             | N/A        |
| 4 |   | <i>(b) Cohort study</i> - For matched studies, give matching criteria and number of exposed and unexposed                                                                                   |                   |                                                                                                                                                                                                                                            |            |
| 5 |   | <i>Case-control study</i> - For matched studies, give matching criteria and the number of controls per case                                                                                 |                   |                                                                                                                                                                                                                                            |            |
| 6 | 7 | Clearly define all outcomes, exposures, predictors, potential confounders, and effect modifiers. Give diagnostic criteria, if applicable.                                                   | Yes/feasibility   | RECORD 7.1: A complete list of codes and algorithms used to classify exposures, outcomes, confounders, and effect modifiers should be provided. If these cannot be reported, an explanation should be provided.                            | Yes/feasi  |
| 7 | 8 | For each variable of interest, give sources of data and details of methods of assessment (measurement). Describe comparability of assessment methods if there is more than one group        | Feasibility study |                                                                                                                                                                                                                                            |            |
| 8 | 9 | Describe any efforts to address potential sources of bias                                                                                                                                   | Feasibility study |                                                                                                                                                                                                                                            |            |

|    |    |                                                                                                                                                                                                                                                                                                                                                                                                                                                                                                                                                                      |                             |                                                                                                                                                       |            |
|----|----|----------------------------------------------------------------------------------------------------------------------------------------------------------------------------------------------------------------------------------------------------------------------------------------------------------------------------------------------------------------------------------------------------------------------------------------------------------------------------------------------------------------------------------------------------------------------|-----------------------------|-------------------------------------------------------------------------------------------------------------------------------------------------------|------------|
| 1  | 10 | Explain how the study size was arrived at                                                                                                                                                                                                                                                                                                                                                                                                                                                                                                                            | Feasibility study           |                                                                                                                                                       |            |
| 2  |    |                                                                                                                                                                                                                                                                                                                                                                                                                                                                                                                                                                      |                             |                                                                                                                                                       |            |
| 3  | 11 | Explain how quantitative variables were handled in the analyses. If applicable, describe which groupings were chosen, and why                                                                                                                                                                                                                                                                                                                                                                                                                                        | Yes, in results             |                                                                                                                                                       |            |
| 4  |    |                                                                                                                                                                                                                                                                                                                                                                                                                                                                                                                                                                      |                             |                                                                                                                                                       |            |
| 5  |    |                                                                                                                                                                                                                                                                                                                                                                                                                                                                                                                                                                      |                             |                                                                                                                                                       |            |
| 6  |    |                                                                                                                                                                                                                                                                                                                                                                                                                                                                                                                                                                      |                             |                                                                                                                                                       |            |
| 7  |    |                                                                                                                                                                                                                                                                                                                                                                                                                                                                                                                                                                      |                             |                                                                                                                                                       |            |
| 8  | 12 | (a) Describe all statistical methods, including those used to control for confounding<br>(b) Describe any methods used to examine subgroups and interactions<br>(c) Explain how missing data were addressed<br>(d) <i>Cohort study</i> - If applicable, explain how loss to follow-up was addressed<br><i>Case-control study</i> - If applicable, explain how matching of cases and controls was addressed<br><i>Cross-sectional study</i> - If applicable, describe analytical methods taking account of sampling strategy<br>(e) Describe any sensitivity analyses | Yes, in methods and results |                                                                                                                                                       |            |
| 9  |    |                                                                                                                                                                                                                                                                                                                                                                                                                                                                                                                                                                      |                             |                                                                                                                                                       |            |
| 10 |    |                                                                                                                                                                                                                                                                                                                                                                                                                                                                                                                                                                      |                             |                                                                                                                                                       |            |
| 11 |    |                                                                                                                                                                                                                                                                                                                                                                                                                                                                                                                                                                      |                             |                                                                                                                                                       |            |
| 12 |    |                                                                                                                                                                                                                                                                                                                                                                                                                                                                                                                                                                      |                             |                                                                                                                                                       |            |
| 13 |    |                                                                                                                                                                                                                                                                                                                                                                                                                                                                                                                                                                      |                             |                                                                                                                                                       |            |
| 14 |    |                                                                                                                                                                                                                                                                                                                                                                                                                                                                                                                                                                      |                             |                                                                                                                                                       |            |
| 15 |    |                                                                                                                                                                                                                                                                                                                                                                                                                                                                                                                                                                      |                             |                                                                                                                                                       |            |
| 16 |    |                                                                                                                                                                                                                                                                                                                                                                                                                                                                                                                                                                      |                             |                                                                                                                                                       |            |
| 17 |    |                                                                                                                                                                                                                                                                                                                                                                                                                                                                                                                                                                      |                             |                                                                                                                                                       |            |
| 18 |    |                                                                                                                                                                                                                                                                                                                                                                                                                                                                                                                                                                      |                             |                                                                                                                                                       |            |
| 19 |    |                                                                                                                                                                                                                                                                                                                                                                                                                                                                                                                                                                      |                             |                                                                                                                                                       |            |
| 20 |    |                                                                                                                                                                                                                                                                                                                                                                                                                                                                                                                                                                      |                             |                                                                                                                                                       |            |
| 21 |    |                                                                                                                                                                                                                                                                                                                                                                                                                                                                                                                                                                      |                             |                                                                                                                                                       |            |
| 22 |    |                                                                                                                                                                                                                                                                                                                                                                                                                                                                                                                                                                      |                             |                                                                                                                                                       |            |
| 23 |    |                                                                                                                                                                                                                                                                                                                                                                                                                                                                                                                                                                      |                             |                                                                                                                                                       |            |
| 24 |    |                                                                                                                                                                                                                                                                                                                                                                                                                                                                                                                                                                      |                             |                                                                                                                                                       |            |
| 25 |    |                                                                                                                                                                                                                                                                                                                                                                                                                                                                                                                                                                      |                             |                                                                                                                                                       |            |
| 26 |    |                                                                                                                                                                                                                                                                                                                                                                                                                                                                                                                                                                      |                             |                                                                                                                                                       |            |
| 27 |    |                                                                                                                                                                                                                                                                                                                                                                                                                                                                                                                                                                      |                             |                                                                                                                                                       |            |
| 28 |    |                                                                                                                                                                                                                                                                                                                                                                                                                                                                                                                                                                      |                             |                                                                                                                                                       |            |
| 29 |    |                                                                                                                                                                                                                                                                                                                                                                                                                                                                                                                                                                      |                             |                                                                                                                                                       |            |
| 30 |    |                                                                                                                                                                                                                                                                                                                                                                                                                                                                                                                                                                      |                             |                                                                                                                                                       |            |
| 31 |    |                                                                                                                                                                                                                                                                                                                                                                                                                                                                                                                                                                      |                             |                                                                                                                                                       |            |
| 32 |    |                                                                                                                                                                                                                                                                                                                                                                                                                                                                                                                                                                      |                             |                                                                                                                                                       |            |
| 33 |    | ..                                                                                                                                                                                                                                                                                                                                                                                                                                                                                                                                                                   |                             | RECORD 12.1: Authors should describe the extent to which the investigators had access to the database population used to create the study population. | N/A        |
| 34 |    |                                                                                                                                                                                                                                                                                                                                                                                                                                                                                                                                                                      |                             |                                                                                                                                                       |            |
| 35 |    |                                                                                                                                                                                                                                                                                                                                                                                                                                                                                                                                                                      |                             |                                                                                                                                                       |            |
| 36 |    |                                                                                                                                                                                                                                                                                                                                                                                                                                                                                                                                                                      |                             |                                                                                                                                                       |            |
| 37 |    |                                                                                                                                                                                                                                                                                                                                                                                                                                                                                                                                                                      |                             |                                                                                                                                                       |            |
| 38 |    |                                                                                                                                                                                                                                                                                                                                                                                                                                                                                                                                                                      |                             |                                                                                                                                                       |            |
| 39 |    |                                                                                                                                                                                                                                                                                                                                                                                                                                                                                                                                                                      |                             |                                                                                                                                                       |            |
| 40 |    |                                                                                                                                                                                                                                                                                                                                                                                                                                                                                                                                                                      |                             | RECORD 12.2: Authors should provide information on the data cleaning methods used in the study.                                                       | N/A        |
| 41 |    |                                                                                                                                                                                                                                                                                                                                                                                                                                                                                                                                                                      |                             |                                                                                                                                                       |            |
| 42 |    |                                                                                                                                                                                                                                                                                                                                                                                                                                                                                                                                                                      |                             |                                                                                                                                                       |            |
| 43 |    | ..                                                                                                                                                                                                                                                                                                                                                                                                                                                                                                                                                                   |                             | RECORD 12.3: State whether the                                                                                                                        | Personal c |
| 44 |    |                                                                                                                                                                                                                                                                                                                                                                                                                                                                                                                                                                      |                             |                                                                                                                                                       |            |
| 45 |    |                                                                                                                                                                                                                                                                                                                                                                                                                                                                                                                                                                      |                             |                                                                                                                                                       |            |
| 46 |    |                                                                                                                                                                                                                                                                                                                                                                                                                                                                                                                                                                      |                             |                                                                                                                                                       |            |
| 47 |    |                                                                                                                                                                                                                                                                                                                                                                                                                                                                                                                                                                      |                             |                                                                                                                                                       |            |
| 48 |    |                                                                                                                                                                                                                                                                                                                                                                                                                                                                                                                                                                      |                             |                                                                                                                                                       |            |
| 49 |    |                                                                                                                                                                                                                                                                                                                                                                                                                                                                                                                                                                      |                             |                                                                                                                                                       |            |
| 50 |    |                                                                                                                                                                                                                                                                                                                                                                                                                                                                                                                                                                      |                             |                                                                                                                                                       |            |
| 51 |    |                                                                                                                                                                                                                                                                                                                                                                                                                                                                                                                                                                      |                             |                                                                                                                                                       |            |
| 52 |    |                                                                                                                                                                                                                                                                                                                                                                                                                                                                                                                                                                      |                             |                                                                                                                                                       |            |
| 53 |    |                                                                                                                                                                                                                                                                                                                                                                                                                                                                                                                                                                      |                             |                                                                                                                                                       |            |
| 54 |    |                                                                                                                                                                                                                                                                                                                                                                                                                                                                                                                                                                      |                             |                                                                                                                                                       |            |
| 55 |    |                                                                                                                                                                                                                                                                                                                                                                                                                                                                                                                                                                      |                             |                                                                                                                                                       |            |
| 56 |    |                                                                                                                                                                                                                                                                                                                                                                                                                                                                                                                                                                      |                             |                                                                                                                                                       |            |
| 57 |    |                                                                                                                                                                                                                                                                                                                                                                                                                                                                                                                                                                      |                             |                                                                                                                                                       |            |
| 58 |    |                                                                                                                                                                                                                                                                                                                                                                                                                                                                                                                                                                      |                             |                                                                                                                                                       |            |
| 59 |    |                                                                                                                                                                                                                                                                                                                                                                                                                                                                                                                                                                      |                             |                                                                                                                                                       |            |
| 60 |    |                                                                                                                                                                                                                                                                                                                                                                                                                                                                                                                                                                      |                             |                                                                                                                                                       |            |

|    |    |                                                                                                                                                                                                                                                                                                                                                 |                                     |                                                                                                                                                                                                                                                                                                                    |                     |
|----|----|-------------------------------------------------------------------------------------------------------------------------------------------------------------------------------------------------------------------------------------------------------------------------------------------------------------------------------------------------|-------------------------------------|--------------------------------------------------------------------------------------------------------------------------------------------------------------------------------------------------------------------------------------------------------------------------------------------------------------------|---------------------|
| 1  |    |                                                                                                                                                                                                                                                                                                                                                 |                                     | study included person-level, institutional-level, or other data linkage across two or more databases. The methods of linkage and methods of linkage quality evaluation should be provided.                                                                                                                         | identified feedback |
| 2  |    |                                                                                                                                                                                                                                                                                                                                                 |                                     |                                                                                                                                                                                                                                                                                                                    |                     |
| 3  |    |                                                                                                                                                                                                                                                                                                                                                 |                                     |                                                                                                                                                                                                                                                                                                                    |                     |
| 4  |    |                                                                                                                                                                                                                                                                                                                                                 |                                     |                                                                                                                                                                                                                                                                                                                    |                     |
| 5  |    |                                                                                                                                                                                                                                                                                                                                                 |                                     |                                                                                                                                                                                                                                                                                                                    |                     |
| 6  |    |                                                                                                                                                                                                                                                                                                                                                 |                                     |                                                                                                                                                                                                                                                                                                                    |                     |
| 7  |    |                                                                                                                                                                                                                                                                                                                                                 |                                     |                                                                                                                                                                                                                                                                                                                    |                     |
| 8  |    |                                                                                                                                                                                                                                                                                                                                                 |                                     |                                                                                                                                                                                                                                                                                                                    |                     |
| 9  | 13 | (a) Report the numbers of individuals at each stage of the study ( <i>e.g.</i> , numbers potentially eligible, examined for eligibility, confirmed eligible, included in the study, completing follow-up, and analysed)<br>(b) Give reasons for non-participation at each stage.<br>(c) Consider use of a flow diagram                          |                                     | RECORD 13.1: Describe in detail the selection of the persons included in the study ( <i>i.e.</i> , study population selection) including filtering based on data quality, data availability and linkage. The selection of included persons can be described in the text and/or by means of the study flow diagram. | N/A                 |
| 10 |    |                                                                                                                                                                                                                                                                                                                                                 |                                     |                                                                                                                                                                                                                                                                                                                    |                     |
| 11 |    |                                                                                                                                                                                                                                                                                                                                                 |                                     |                                                                                                                                                                                                                                                                                                                    |                     |
| 12 |    |                                                                                                                                                                                                                                                                                                                                                 |                                     |                                                                                                                                                                                                                                                                                                                    |                     |
| 13 |    |                                                                                                                                                                                                                                                                                                                                                 |                                     |                                                                                                                                                                                                                                                                                                                    |                     |
| 14 |    |                                                                                                                                                                                                                                                                                                                                                 |                                     |                                                                                                                                                                                                                                                                                                                    |                     |
| 15 |    |                                                                                                                                                                                                                                                                                                                                                 |                                     |                                                                                                                                                                                                                                                                                                                    |                     |
| 16 |    |                                                                                                                                                                                                                                                                                                                                                 |                                     |                                                                                                                                                                                                                                                                                                                    |                     |
| 17 |    |                                                                                                                                                                                                                                                                                                                                                 |                                     |                                                                                                                                                                                                                                                                                                                    |                     |
| 18 |    |                                                                                                                                                                                                                                                                                                                                                 |                                     |                                                                                                                                                                                                                                                                                                                    |                     |
| 19 |    |                                                                                                                                                                                                                                                                                                                                                 |                                     |                                                                                                                                                                                                                                                                                                                    |                     |
| 20 |    |                                                                                                                                                                                                                                                                                                                                                 |                                     |                                                                                                                                                                                                                                                                                                                    |                     |
| 21 | 14 | (a) Give characteristics of study participants ( <i>e.g.</i> , demographic, clinical, social) and information on exposures and potential confounders<br>(b) Indicate the number of participants with missing data for each variable of interest<br>(c) <i>Cohort study</i> - summarise follow-up time ( <i>e.g.</i> , average and total amount) | Not available<br><br>N/A<br><br>N/A |                                                                                                                                                                                                                                                                                                                    |                     |
| 22 |    |                                                                                                                                                                                                                                                                                                                                                 |                                     |                                                                                                                                                                                                                                                                                                                    |                     |
| 23 |    |                                                                                                                                                                                                                                                                                                                                                 |                                     |                                                                                                                                                                                                                                                                                                                    |                     |
| 24 |    |                                                                                                                                                                                                                                                                                                                                                 |                                     |                                                                                                                                                                                                                                                                                                                    |                     |
| 25 |    |                                                                                                                                                                                                                                                                                                                                                 |                                     |                                                                                                                                                                                                                                                                                                                    |                     |
| 26 |    |                                                                                                                                                                                                                                                                                                                                                 |                                     |                                                                                                                                                                                                                                                                                                                    |                     |
| 27 |    |                                                                                                                                                                                                                                                                                                                                                 |                                     |                                                                                                                                                                                                                                                                                                                    |                     |
| 28 |    |                                                                                                                                                                                                                                                                                                                                                 |                                     |                                                                                                                                                                                                                                                                                                                    |                     |
| 29 |    |                                                                                                                                                                                                                                                                                                                                                 |                                     |                                                                                                                                                                                                                                                                                                                    |                     |
| 30 |    |                                                                                                                                                                                                                                                                                                                                                 |                                     |                                                                                                                                                                                                                                                                                                                    |                     |
| 31 |    |                                                                                                                                                                                                                                                                                                                                                 |                                     |                                                                                                                                                                                                                                                                                                                    |                     |
| 32 |    |                                                                                                                                                                                                                                                                                                                                                 |                                     |                                                                                                                                                                                                                                                                                                                    |                     |
| 33 |    |                                                                                                                                                                                                                                                                                                                                                 |                                     |                                                                                                                                                                                                                                                                                                                    |                     |
| 34 | 15 | <i>Cohort study</i> - Report numbers of outcome events or summary measures over time<br><i>Case-control study</i> - Report numbers in each exposure category, or summary measures of exposure<br><i>Cross-sectional study</i> - Report numbers of outcome events or                                                                             | N/A                                 |                                                                                                                                                                                                                                                                                                                    |                     |
| 35 |    |                                                                                                                                                                                                                                                                                                                                                 |                                     |                                                                                                                                                                                                                                                                                                                    |                     |
| 36 |    |                                                                                                                                                                                                                                                                                                                                                 |                                     |                                                                                                                                                                                                                                                                                                                    |                     |
| 37 |    |                                                                                                                                                                                                                                                                                                                                                 |                                     |                                                                                                                                                                                                                                                                                                                    |                     |
| 38 |    |                                                                                                                                                                                                                                                                                                                                                 |                                     |                                                                                                                                                                                                                                                                                                                    |                     |
| 39 |    |                                                                                                                                                                                                                                                                                                                                                 |                                     |                                                                                                                                                                                                                                                                                                                    |                     |
| 40 |    |                                                                                                                                                                                                                                                                                                                                                 |                                     |                                                                                                                                                                                                                                                                                                                    |                     |
| 41 |    |                                                                                                                                                                                                                                                                                                                                                 |                                     |                                                                                                                                                                                                                                                                                                                    |                     |
| 42 |    |                                                                                                                                                                                                                                                                                                                                                 |                                     |                                                                                                                                                                                                                                                                                                                    |                     |
| 43 |    |                                                                                                                                                                                                                                                                                                                                                 |                                     |                                                                                                                                                                                                                                                                                                                    |                     |

44  
45  
46  
47  
48  
49  
50  
51  
52  
53  
54  
55  
56  
57  
58  
59  
60

|                                                                                                                                                    |    |                                                                                                                                                                                                                                                                                                                                                                                                                 |                                |                                                                                                                                                                                                                                                                                                          |                                            |
|----------------------------------------------------------------------------------------------------------------------------------------------------|----|-----------------------------------------------------------------------------------------------------------------------------------------------------------------------------------------------------------------------------------------------------------------------------------------------------------------------------------------------------------------------------------------------------------------|--------------------------------|----------------------------------------------------------------------------------------------------------------------------------------------------------------------------------------------------------------------------------------------------------------------------------------------------------|--------------------------------------------|
|                                                                                                                                                    |    | summary measures                                                                                                                                                                                                                                                                                                                                                                                                |                                |                                                                                                                                                                                                                                                                                                          |                                            |
| 1<br>2<br>3<br>4<br>5<br>6<br>7<br>8<br>9<br>10<br>11<br>12<br>13<br>14<br>15<br>16<br>17                                                          | 16 | (a) Give unadjusted estimates and, if applicable, confounder-adjusted estimates and their precision (e.g., 95% confidence interval). Make clear which confounders were adjusted for and why they were included<br>(b) Report category boundaries when continuous variables were categorized<br>(c) If relevant, consider translating estimates of relative risk into absolute risk for a meaningful time period | Feasibility study              |                                                                                                                                                                                                                                                                                                          |                                            |
| 18<br>19<br>20<br>21<br>22                                                                                                                         | 17 | Report other analyses done— e.g., analyses of subgroups and interactions, and sensitivity analyses                                                                                                                                                                                                                                                                                                              | N/A                            |                                                                                                                                                                                                                                                                                                          |                                            |
| 23<br>24<br>25                                                                                                                                     | 18 | Summarise key results with reference to study objectives                                                                                                                                                                                                                                                                                                                                                        | Yes, in box                    |                                                                                                                                                                                                                                                                                                          |                                            |
| 26<br>27<br>28<br>29<br>30<br>31<br>32<br>33<br>34<br>35                                                                                           | 19 | Discuss limitations of the study, taking into account sources of potential bias or imprecision. Discuss both direction and magnitude of any potential bias                                                                                                                                                                                                                                                      | Yes, in limitations section    | RECORD 19.1: Discuss the implications of using data that were not created or collected to answer the specific research question(s). Include discussion of misclassification bias, unmeasured confounding, missing data, and changing eligibility over time, as they pertain to the study being reported. | Yes, feasibility study for designing study |
| 36<br>37<br>38<br>39<br>40<br>41<br>42<br>43<br>44<br>45<br>46<br>47<br>48<br>49<br>50<br>51<br>52<br>53<br>54<br>55<br>56<br>57<br>58<br>59<br>60 | 20 | Give a cautious overall interpretation of results considering objectives, limitations, multiplicity of analyses, results from similar studies, and other relevant evidence                                                                                                                                                                                                                                      | Yes, in interpretation section |                                                                                                                                                                                                                                                                                                          |                                            |

|                                  |    |                                                                                                                                                               |     |                                                                                                                                                          |            |
|----------------------------------|----|---------------------------------------------------------------------------------------------------------------------------------------------------------------|-----|----------------------------------------------------------------------------------------------------------------------------------------------------------|------------|
| 1<br>2<br>3                      | 21 | Discuss the generalisability (external validity) of the study results                                                                                         | Yes |                                                                                                                                                          |            |
| <b>Information</b>               |    |                                                                                                                                                               |     |                                                                                                                                                          |            |
| 4<br>5<br>6<br>7<br>8<br>9<br>10 | 22 | Give the source of funding and the role of the funders for the present study and, if applicable, for the original study on which the present article is based | Yes |                                                                                                                                                          |            |
| 11<br>12<br>13<br>14<br>15<br>16 |    | ..                                                                                                                                                            |     | RECORD 22.1: Authors should provide information on how to access any supplemental information such as the study protocol, raw data, or programming code. | Yes, in ap |

17  
18 Benchimol EI, Smeeth L, Guttman A, Harron K, Moher D, Petersen I, Sørensen HT, von Elm E, Langan SM, the RECORD  
19 The REporting of studies Conducted using Observational Routinely-collected health Data (RECORD) Statement. *PLoS Medi*  
20

21  
22 is protected under Creative Commons Attribution ([CC BY](https://creativecommons.org/licenses/by/4.0/)) license.  
23

Confidential

24  
25  
26  
27  
28  
29  
30  
31  
32  
33  
34  
35  
36  
37  
38  
39  
40  
41  
42  
43  
44  
45  
46  
47  
48  
49  
50  
51  
52  
53  
54  
55  
56  
57  
58  
59  
60



1  
2  
3  
4  
5  
6  
7  
8  
9  
10  
11  
12  
13  
14 **VARIABLE ACCESS FOR ANTIVIRAL TREATMENT OF CHRONIC HEPATITIS B**  
15 **INFECTION IN CANADA: A DESCRIPTIVE STUDY**  
16

17 Stephen E. Congly<sup>1</sup> MD, MSc, FRCPC and Mayur Brahmania<sup>2</sup> MD, MPH, FRCPC  
18

19 <sup>1</sup>Department of Medicine, Division of Gastroenterology and Hepatology, Foothills Medical Center,  
20 University of Calgary, Calgary, AB, Canada & <sup>2</sup>Department of Medicine, Division of  
21 Gastroenterology and Multi Organ Transplant Unit, London Health Sciences Center, University of  
22 Western, London, ON, Canada  
23  
24  
25  
26  
27  
28  
29  
30  
31  
32  
33  
34  
35  
36  
37  
38  
39  
40  
41  
42  
43  
44  
45  
46  
47  
48  
49  
50  
51  
52  
53  
54  
55  
56  
57  
58  
59  
60

**Contact Information:**

Mayur Brahmania MD MPH FRCPC

Division of Gastroenterology and Multi Organ Transplant Unit

University of Western

Room A10-224

London Health Sciences Centre: University Hospital

London, Ontario, Canada

N6A 5A5

Telephone: 519-663-3946

Fax: 519-663-3876

## **ABSTRACT**

**Background:** Antiviral treatment for chronic hepatitis B (CHB) infection can be costly, which presents challenges for universal drug coverage for the estimated 600,000 people living with CHB in Canada. We appraised criteria for reimbursement of CHB antivirals in Canada.

**Methods:** We reviewed the reimbursement criteria for lamivudine (LAM), adefovir (ADF), tenofovir (TDF), entecavir (ETV), telbivudine (TBV), pegylated or standard interferon (IFN), and emtricitabine/TDF in the 10 provinces and 3 territories as well as federal programs. Data was extracted from publically available formularies. The primary outcomes extracted were prescriber details, reimbursement regulations and published list price.

**Results:** All public insurance programs limit access to antiviral treatment in patients with CHB based on viral characteristics, fibrosis or specialist approval. LAM use is only restricted by BC and Ontario. 43% of programs cover either ETV or TDF with no restriction while the remainder of programs cover these agents if patients have advanced fibrosis/cirrhosis. 64.3% of programs provide coverage of IFN although almost half of these programs only reimburse non-pegylated IFN, which is not currently recommended for CHB treatment.

**Interpretation:** This descriptive review of criteria for reimbursement of CHB antivirals in Canada showed substantial variability among provinces and territories along with reimbursement criteria inconsistent with current practices in the management of CHB. The findings can inform health policy and support the development and adoption of a national CHB strategy to ensure equitable and timely access to treatment no matter where patients reside in Canada.

**Key Words:** Reimbursement, CHB, Insurance, Access

## **INTRODUCTION:**

Chronic hepatitis B (CHB) is a global infection affecting over 250 million individuals with different prevalence depending on the geographic region (1). In Canada, up to 600,000 individuals are chronically infected, with 70% of CHB carriers being immigrants (2-5). It is estimated over a lifetime of CHB infection that 40% of patients will progress to cirrhosis, hepatocellular carcinoma (HCC), and/or liver-related mortality (6-9). The Ontario Burden of Infectious Disease Study recently found CHB ranked as the fourth most common cause of death (346/year) among all infectious diseases annually, but also fourth in years lost due to premature mortality, years equivalent of reduced functioning, and total health adjusted life years, ranking just behind hepatitis C, human papilloma virus (HPV), and *Streptococcus pneumoniae* but noticeably ahead of HIV (6th), *Clostridium difficile* (9th), and tuberculosis (16th) (10).

The goal of treatment for CHB is to improve quality of life, prevent/reverse liver disease progression to liver cirrhosis and liver failure, and to minimize the risk of HCC. Major worldwide associations, including the Canadian Association for the Study of the Liver (CASL), American Association of the Study of Liver Disease (AASLD), the European Association for the Study of Liver (EASL), and the Asian Pacific Association for the Study of the Liver (APASL) have developed treatment algorithms documenting effective timing of therapy to prevent the aforementioned complications (Table 1 and 2) (11-14).

Provincial regulations may limit the ability of physicians to deliver safe, effective, and tolerable antivirals due to cost or outdated policies. A Canadian study has shown the major barrier to adequate care for CHB remains the provincial restrictions on reimbursement with 64% of patients on treatment requiring reimbursement through public drug programs (15). As Canada remains a top destination for immigrants and despite implementation of a universal vaccination program, the CHB

1  
2  
3 population will continue to rise or at the very least stay constant due to immigration. Thus, the  
4  
5 primary aim of the study was to appraise reimbursement criteria in Canada for all commercially  
6  
7 approved therapies for CHB including lamivudine (LAM), adefovir (ADF), tenofovir (TDF),  
8  
9 entecavir (ETV), telbivudine (TBV), pegylated or standard interferon (IFN), and emtricitabine/TDF.  
10  
11  
12  
13

## 14 **METHODS:**

### 15 16 17 *Data sources*

18  
19  
20 We collected reimbursement criteria for TDF, ETV, IFN, LAM, TBV, ADF, and  
21  
22 emtricitabine/TDF for all provinces and territories in Canada as well as the federal programs of  
23  
24 Correctional Services Canada (CSC), Veterans' Affairs and Non-Insured Health Benefits (NIHB) for  
25  
26 First Nations and Inuit. Each provincial/territorial health ministry sets its own reimbursement criteria  
27  
28 thus information was collected from jurisdiction websites. We extracted data from publicly available  
29  
30 online reimbursement information (Appendix 1) as well as e-mailed provincial health authorities  
31  
32 when required for further information. When information could not be retrieved or was not available  
33  
34 (e.g., the therapy was not reimbursed), data were labelled "NA" (i.e., not available). Information was  
35  
36 collected by both authors and cross-checked with inconsistencies being resolved through consensus.  
37  
38  
39  
40  
41

### 42 *Primary outcomes*

43  
44  
45 Primary outcomes were based on: 1) minimum fibrosis stage required and 2) prescriber type  
46  
47 restrictions. The data was organized into categories so that criteria could be compared across  
48  
49 provinces/territories. We categorized fibrosis data as the minimum fibrosis stage required  
50  
51 (categories: no restrictions,  $\geq$  F2,  $\geq$  F3 or F4 of the Meta-Analysis of Histologic Data in Viral  
52  
53 Hepatitis scoring system or equivalent). Prescriber data were categorized as whether any provider  
54  
55  
56  
57  
58  
59  
60

1  
2  
3 could prescribe the medication, if there was restriction by speciality (e.g. internal medicine,  
4 hepatologist, gastroenterologist or infectious diseases) or whether a provider with experience treating  
5 patients with CHB infection could prescribe treatment once designated prescriber status as defined  
6 by the jurisdiction was met.  
7  
8  
9  
10  
11  
12

### 13 *Statistical Analysis*

14  
15  
16 We used descriptive statistics to show the proportion of provinces/territories that restrict drug  
17 coverage by primary outcome.  
18  
19  
20

## 21 **RESULTS:**

### 22 **Prescriber Limitations for CHB Treatment**

23  
24  
25 Prescriptions for CHB were restricted to specialists/designated prescribers in 5/14 (36%)  
26 programs. In Saskatchewan, Nova Scotia, and the Yukon, specialist recommendation/consultation  
27 was encouraged although who exactly was considered a specialist was not explicitly defined. In New  
28 Brunswick, permissible prescribers included hepatologists, gastroenterologists and infectious  
29 diseases specialists, while in Alberta all internal medicine specialists, which would encompass New  
30 Brunswick's categories, were authorized prescribers. For both Alberta and New Brunswick,  
31 practitioners with experience in CHB management could apply to become a designated prescriber.  
32  
33  
34  
35  
36  
37  
38  
39  
40  
41  
42  
43

### 44 **Reimbursement Requirements for Drugs**

#### 45 *Lamivudine*

46  
47  
48 Lamivudine (LAM) is covered by all provincial and federal plans although there are  
49 significant differences between coverage requirements (Table 3). In Manitoba, Quebec, the Yukon,  
50 PEI, Newfoundland and Labrador and all three federal programs there is no restriction on access or  
51  
52  
53  
54  
55  
56  
57  
58  
59  
60

1  
2  
3 who can prescribe LAM for CHB. Notably, Newfoundland and Labrador restrict prescriptions to 30  
4 days and use a 150 mg formulation, which is not the recommended dose, i.e., 100 mg. Alberta, New  
5 Brunswick, Nova Scotia and Saskatchewan restrict prescribers, as described above, although  
6  
7 Saskatchewan only recommends consultation with a specialist. Ontario will cover patients with HBV  
8 DNA levels over 1000 IU/mL with elevated liver enzymes or evidence of fibrosis/cirrhosis. The most  
9  
10 restrictive province is BC with specific requirements for HBV DNA levels and ALT levels in non-  
11  
12  
13  
14  
15 restrictive province is BC with specific requirements for HBV DNA levels and ALT levels in non-  
16  
17  
18  
19  
20  
21  
22  
23  
24  
25  
26  
27  
28  
29  
30  
31  
32  
33  
34  
35  
36  
37  
38  
39  
40  
41  
42  
43  
44  
45  
46  
47  
48  
49  
50  
51  
52  
53  
54  
55  
56  
57  
58  
59  
60

### *Adefovir*

The majority of public drug plans restrict or do not cover adefovir (ADF) with the least restrictions found in Alberta requiring only an authorized prescriber while CSC had no restrictions reported. Adefovir is not covered by Manitoba, Ontario, New Brunswick or Veterans Affairs. For many public plans (Saskatchewan, Quebec, New Brunswick, PEI, Yukon and NIHB), ADF would be covered in combination with LAM if there was LAM failure based on a DNA of >1 log above the nadir after three months of treatment provided noncompliance was not the reason for failure as per the Canadian Drug Expert Committee (CDEC). Saskatchewan and the Yukon require specialist input. BC also follows the CDEC recommendation but does not require LAM to be used with ADF. Quebec additionally covers patients with an increase in the HBV DNA by 1 log or proven resistance with a HBV DNA >20,000 IU/mL in patients with Child Pugh B/C cirrhosis, post liver transplant patients, patients co-infected with HIV but not on anti-retrovirals, patients with HBV DNA >20,000 IU/mL (HBeAg positive) or >2,000 IU/mL in HBeAg negative patients.

### ***Telvivudine***

None of the provincial drug programs nor any of the federal programs reimburse telvivudine.

### ***Emtricitabine/Tenofovir***

The minority of public programs cover emtricitabine/TDF for CHB treatment. Quebec, New Brunswick and the federal programs have no restrictions on coverage and Yukon covers it on a case-by-case recommendation. Saskatchewan, Manitoba, Ontario, PEI and Newfoundland and Labrador cover this drug for HIV infection only while it is not covered for any indication in BC, Alberta and Nova Scotia.

### ***Tenofovir***

There are currently two forms of tenofovir on the market: tenofovir disoproxil fumarate (TDF) which has recently become generic as well as tenofovir alafenamide fumarate (TAF). The latter was approved by Health Canada in June 2017. No public health plans in Canada reimburse TAF. Only a few provinces cover TDF with few or no restrictions; Alberta requires TDF be prescribed by an authorized prescriber while Quebec, PEI, New Brunswick, CSC and Veteran Affairs have no restrictions. Interestingly, CSC covers the 245 mg formulation of TDF, which is usually prescribed at 300mg. TDF is covered in the Yukon on a case-by-case evaluation with recommendation by a specialist. In Saskatchewan, Manitoba, New Brunswick, Nova Scotia, Newfoundland and Labrador and the NIHB, TDF is covered for patients with cirrhosis and a DNA >2000 IU/mL matching the CDEC recommendation with Saskatchewan also suggesting specialist involvement. Manitoba additionally will cover TDF in patients with cirrhosis and resistance to LAM. Ontario covers TDF for patients with HBV DNA levels over 1000 IU/mL with elevated liver

1  
2  
3 enzymes or evidence of fibrosis/cirrhosis. Ontario will also cover TDF for patients who have failed  
4 other therapies, pregnant patients with DNA > 1,000,000 IU/mL and for chemoprophylaxis. BC has  
5 the most restrictive guidelines for TDF covering only non-cirrhotic patients with LAM resistance,  
6 ADF experienced with viremia and LAM resistance. For patients with cirrhosis, either a HBV DNA  
7 >200,000 IU/mL) or between 2000-200,000 IU/mL and ALT >3x ULN is required for coverage.  
8  
9  
10  
11  
12  
13  
14  
15  
16

### 17 *Entecavir*

18  
19 Entecavir (ETV) coverage requirements are similar to TDF in most provinces. Quebec,  
20 Manitoba and CSC cover ETV in adults with no restrictions while Alberta covers it at the request of  
21 an authorized prescriber. In Saskatchewan, most maritime provinces as well as the NIHB, the  
22 coverage criteria are identical to the CDEC guidelines of having cirrhosis and having a DNA >2000  
23 IU/mL. Coverage in the Yukon is case by case by specialist request and is not covered by Veteran  
24 Affairs. BC and New Brunswick have identical coverage requirements for ETV as it does for TDF  
25 (see above). In Ontario, ETV is covered with HBV DNA levels over 1000 IU/mL with elevated liver  
26 enzymes or evidence of fibrosis/cirrhosis, intolerance to other HBV medications as well as for  
27 chemoprophylaxis.  
28  
29  
30  
31  
32  
33  
34  
35  
36  
37  
38  
39  
40  
41

### 42 *Peginterferon Alfa-2a/2b*

43  
44 Interferon in any form is not covered for CHB treatment in the Yukon, Manitoba, Nova  
45 Scotia or PEI. Manitoba covers peginterferon alfa-2a for HCV while PEI covers both forms for  
46 HCV. Peginterferon alfa-2a is the preferred drug in Alberta (prescribed by an authorized prescriber),  
47 Quebec, New Brunswick, and in the NIHB. Quebec has no restrictions on peginterferon alfa-2a's use  
48 while New Brunswick covers HBeAg negative chronic hepatitis B patients with compensated liver  
49  
50  
51  
52  
53  
54  
55  
56  
57  
58  
59  
60



1  
2  
3 disease, liver inflammation and evidence of viral replication with demonstrated intolerance or failure  
4 to LAM therapy for 48 weeks with specialist requests. NIHB covers patients with a DNA >2000  
5 IU/mL without cirrhosis and no limitation on HBeAg status on the request of a specialist. BC covers  
6 interferon alfa-2b in patients who are HBeAg positive with an ALT > 2x ULN for 24 weeks.  
7  
8 Similarly, Ontario covers interferon alfa requiring F3 fibrosis or less on biopsy, age less than 50,  
9 DNA between 10,000-10,000,000 IU/mL and two ALT values of >2x ULN in the past 6 months.  
10  
11 CSC is the most liberal for coverage allowing for both pegylated interferon alfa-1 and alfa-2 to be  
12 prescribed. In Saskatchewan, interferon alfa-2b is covered for up to 6 months, Newfoundland covers  
13 alfa 1a and 2b with identical criterion to New Brunswick while Veteran Affairs covers interferon alfa  
14  
15  
16  
17  
18  
19  
20  
21  
22  
23  
24  
25  
26  
27  
28  
29  
30  
31  
32  
33  
34  
35  
36  
37  
38  
39  
40  
41  
42  
43  
44  
45  
46  
47  
48  
49  
50  
51  
52  
53  
54  
55  
56  
57  
58  
59  
60

### **INTERPRETATION:**

We found substantial variability in criteria for reimbursement of CHB antivirals by jurisdiction in Canada. Currently, no provinces/territories limit reimbursement to only patients with advanced fibrosis, but 2/14 (14%) explicitly require elevated ALT levels. CDEC recommendations limiting ETV and TDF to patients who had cirrhosis were present in 6/14 (43%) of programs. Overall, 4/13 (31%) of jurisdictions had some form of explicit restriction of prescribers to specialists.

A number of the reimbursement requirements nationally are somewhat perplexing. It is unclear why interferon is approved for HBe antigen negative patients and not for HBe antigen positive patients in a number of provinces given the reasonable response rate in the HBe antigen positive population (12). In addition, restrictions such as fibrosis stage are neither cost-effective nor evidence-based. Although a “one-size-fits-all” strategy has drawbacks (e.g., the ability of

1  
2  
3 provinces/territories to respond to CHB burdens will vary), the development and adoption of a  
4 national CHB strategy in Canada akin to hepatitis C care in Australia could facilitate volume-based  
5 discounting, reduce provincial/territorial heterogeneity and direct treatment to at-risk populations.  
6  
7 Further, equitable access could be broadened to eliminate the “postal code lottery” to enable the safe  
8 and effective treatment of CHB while controlling the burden of CHB care in Canada. Clinician  
9  
10 knowledge of drug prices is variable (16) which may impact delivery of the highest value care, and  
11  
12 so in addition to further education, prudent policy coverage decisions will also be critical to deliver  
13  
14 cost-effective care.  
15  
16  
17  
18  
19  
20

21  
22 When CDEC made its initial recommendations, TDF and ETV were approximately \$18-  
23  
24 22/day in which case restriction of a drug to patients with advanced fibrosis could theoretically make  
25  
26 sense from a cost-effectiveness/budget impact standpoint. However, with generic TDF entering the  
27  
28 market the difference between LAM and highly potent oral nucleos/tide analogues (i.e., TDF/ETV) is  
29  
30 between \$1-2/day (Table 4). Lamivudine is not a favoured drug given the high rate of resistance  
31  
32 (70% in five years) and weaker viral suppression (17). The reduced efficacy of viral suppression may  
33  
34 allow patients to develop progressive fibrosis in spite of being on treatment, which will increase the  
35  
36 overall burden on the health care system economically. As such, the initial savings with using LAM  
37  
38 as a drug will likely lead to additional costs downstream. It would be an important area of future  
39  
40 investigation to repeat the previous economic analyses with more modern outcome data and costs as  
41  
42 well as budget impact analyses to improve our use of resources and patient outcomes and hopefully  
43  
44 standardize care nationally.  
45  
46  
47  
48  
49

50  
51 Based on the current list pricing of medications as well as the different populations these  
52  
53 drugs would be considered in, we propose recommendations for reimbursement nationwide  
54  
55 considering best practices and the cost of drugs in alignment with internationally recognized  
56  
57  
58  
59  
60

1  
2  
3 guidelines (Table 5). We acknowledge the immediate budget impact may vary from jurisdiction to  
4 jurisdiction although our recommendations are designed to be cost-effective in the long-term and  
5 eliminate costly and less effective drugs from routine reimbursement.  
6  
7  
8  
9

### 10 ***Limitations:***

11  
12  
13  
14 There were several study limitations. Not all provinces/jurisdictions provided pricing information  
15 about the medications and there is the potential that the online criteria may be incomplete. Further,  
16 criteria may have been updated after the data were extracted although typically most formularies do  
17 not change significantly month to month. As well, this study cannot address implementation of  
18 criteria. Last, this study only examines publically available formularies as we were unable to retrieve  
19 online private health insurance criteria for comparison  
20  
21  
22  
23  
24  
25  
26  
27

### 28 ***Implications for practice:***

29  
30  
31  
32 This review of criteria for reimbursement of CHB antivirals in Canada showed considerable  
33 reimbursement heterogeneity due to a lack of government alliance and direction for the treatment of  
34 CHB. To achieve World Health Organization hepatitis elimination targets by 2030 increased  
35 identification and uptake of CHB therapy, especially by the immigrant population, is essential to  
36 reduce CHB incidence and contribute to viral elimination in Canada (18).  
37  
38  
39  
40  
41  
42  
43  
44  
45  
46

### 47 **CONCLUSION:**

48  
49  
50 The current criteria for reimbursement of antiviral medication to treat CHB in Canada shows  
51 substantial interjurisdictional heterogeneity with most provinces/territories having restrictions based  
52 on liver disease stage and allowing prescribing by specialists only. Given the significant variability to  
53  
54  
55  
56  
57  
58  
59  
60

1  
2  
3 access currently and marked drop in drug prices we advocate for improved access to medications  
4  
5 nationally to improve patient outcomes and eliminate geographical disparity.  
6  
7  
8  
9  
10

11  
12 **REFERENCES:**  
13

- 14
- 15 1) Schweitzer A, Horn J, Mikolajczyk R, Krause G, Ott J. Estimations of worldwide prevalence  
16 of chronic hepatitis B virus infection: a systematic review of data published between 1965  
17 and 2013. *The Lancet*. 2015;386(10003):1546-1555.  
18
  - 19 2) Zhang J, Zou S, Giulivi A. Epidemiology of Hepatitis B in Canada. *Canadian Journal of*  
20 *Infectious Diseases*. 2001;12(6):345-350.  
21
  - 22 3) Leber A, Sherman M. Estimation of Immigration Related Chronic Hepatitis B Infection and  
23 *Hepatocellular Carcinoma Development in Canada from 1981-2006*. *Canadian Journal of*  
24 *Gastroenterology*. 2008; 23 (Suppl A): 22.  
25
  - 26 4) Sherman M, Bain V, Villeneuve J, Myers R, Cooper C, Martin S et al. The Management of  
27 *Chronic Viral Hepatitis: A Canadian Consensus Conference 2004*. *Canadian Journal of*  
28 *Gastroenterology*. 2004;18(12):715-728.  
29
  - 30 5) Minuk G, Uhanova J. Chronic Hepatitis B in Canada. *Canadian Journal of Infectious*  
31 *Diseases*. 2001;12(6):351-356.  
32
  - 33 6) Chen C. Risk of Hepatocellular Carcinoma Across a Biological Gradient of Serum Hepatitis  
34 *B Virus DNA Level*. *JAMA*. 2006;295(1):65-73.  
35  
36  
37  
38  
39  
40  
41  
42  
43  
44  
45  
46  
47  
48  
49  
50  
51  
52  
53  
54  
55  
56  
57  
58  
59  
60

- 1  
2  
3 7) Iloeje U, Yang H, Su J, Jen C, You S, Chen C. Predicting Cirrhosis Risk Based on the Level  
4 of Circulating Hepatitis B Viral Load. *Gastroenterology*. 2006;130(3):678-686.  
5  
6  
7
- 8 8) Iloeje U, Yang H, Jen C, Su J, Wang L, You S et al. Risk and Predictors of Mortality  
9 Associated with Chronic Hepatitis B Infection. *Clinical Gastroenterology and Hepatology*.  
10 2007;5(8):921-931.  
11  
12  
13
- 14 9) Minuk GY, Uhanova J. Chronic Hepatitis B Infection in Canada. *Canadian Journal of*  
15 *Infectious Diseases*. 2011; (12):351-356.  
16  
17  
18
- 19 10) Kwong JC, Crowcroft NS, Campitelli MA, et al. Ontario Burden of Infectious Disease Study  
20 *Advisory Group; Ontario Burden of Infectious Disease Study(ONBOIDS): An OAHPP/ICES*  
21 *Report (Internet)*. 2010 (cited July 13, 2018). Available from:  
22 [http://www.ices.on.ca/file/ONBOIDS\\_FullReport\\_intra.pdf](http://www.ices.on.ca/file/ONBOIDS_FullReport_intra.pdf).  
23  
24  
25  
26  
27  
28  
29  
30
- 31 11) Coffin C, Fung S, Ma M. Management of Chronic Hepatitis B: Canadian Association for the  
32 *Study of the Liver Consensus Guidelines*. *Canadian Journal of Gastroenterology*.  
33 2012;26(12):917-938.  
34  
35  
36  
37  
38
- 39 12) Terrault N, Lok A, McMahon B, Chang K, Hwang J, Jonas M et al. Update on prevention,  
40 diagnosis, and treatment of chronic hepatitis B: AASLD 2018 hepatitis B guidance.  
41 *Hepatology*. 2018;67(4):1560-1599.  
42  
43  
44  
45  
46
- 47 13) European Association for the Study of the Liver. EASL 2017 Clinical Practice Guidelines on  
48 the management of hepatitis B virus infection. *Journal of Hepatology*. 2017;(67):370–398.  
49  
50  
51  
52
- 53 14) Sarin SK, Kumar M, Lau GK, et al. Asian-Pacific clinical practice guidelines on the  
54 management of hepatitis B: a 2015 update. *Hepatology International*. 2016;10(1):1-98.  
55  
56  
57  
58  
59  
60

- 1  
2  
3 15) Marotta P, Lucas K. Management of Hepatitis B: A Longitudinal National Survey – Impact  
4 of the Canadian Hepatitis B Consensus Guidelines. Canadian Journal of Gastroenterology.  
5 2010;24(9):537-542.  
6  
7  
8  
9  
10  
11 16) Gorfinkel I, Lexchin J. We need to mandate drug cost transparency on electronic medical  
12 records. Canadian Medical Association Journal. 2017;189(50):E1541-E1542.  
13  
14  
15  
16 17) Lai C, Dienstag J, Schiff E, Leung N, Atkins M, Hunt C et al. Prevalence and Clinical  
17 Correlates of YMDD Variants during Lamivudine Therapy for Patients with Chronic  
18 Hepatitis B. Clinical Infectious Diseases. 2003;36(6):687-696.  
19  
20  
21  
22  
23  
24 18) Combating hepatitis B and C to reach elimination by 2030 [Internet]. World Health  
25 Organization. 2018 [cited 13 July 2018]. Available from:  
26  
27 <http://www.who.int/hepatitis/publications/hep-elimination-by-2030-brief/en/>  
28  
29  
30  
31  
32  
33  
34  
35  
36  
37  
38  
39  
40  
41  
42  
43  
44  
45  
46  
47  
48  
49  
50  
51  
52  
53  
54  
55  
56  
57  
58  
59  
60

**Table 1:** Treatment Recommendations by Various International Organizations: HBeAg-Positive.

|                                         | <b>AASLD 2018 (USA)</b>                                                                                                                                | <b>EASL 2017 (Europe)</b>                                                                                                                               | <b>CASL 2012 (Canada)</b>                                                                                    | <b>APASL 2015 (Asia)</b>                                                                                                                                                                                                                                             |
|-----------------------------------------|--------------------------------------------------------------------------------------------------------------------------------------------------------|---------------------------------------------------------------------------------------------------------------------------------------------------------|--------------------------------------------------------------------------------------------------------------|----------------------------------------------------------------------------------------------------------------------------------------------------------------------------------------------------------------------------------------------------------------------|
| <b>Treatment Definitely Recommended</b> | 1. ALT >2x ULN and HBV DNA >20,000                                                                                                                     | 1. ALT >2xULN and HBV DNA >20,000<br>2. ALT >ULN and HBV DNA >2000 and/or Liver biopsy showing moderate to severe inflammation/fibrosis<br>3. Cirrhosis | 1. ALT elevated for 3-6 months and HBV DNA >20,000                                                           | 1. ALT >2x ULN And HBV DNA >20,000<br>2. Liver biopsy showing moderate to severe inflammation/ significant fibrosis<br>3. Compensated cirrhosis and HBV DNA >2000<br>4. Decompensated cirrhosis                                                                      |
| <b>Treatment Should be Considered</b>   | 1. ALT >2xULN and HBV DNA 2000-20,000<br>2. ALT 1-2x ULN and HBV DNA >20,000<br>3. Age over 40<br>4. Evidence of moderate/severe inflammation/fibrosis | 1. HBV DNA elevated and Age over 30<br>2. Family history of HCC or cirrhosis and extrahepatic manifestations                                            | 1. ALT >ULN for 3-6 months or liver biopsy showing moderate/severe inflammation/fibrosis and HBV DNA >20,000 | Monitor all non-treated patients every 3 months.<br>Biopsy recommended for treatment decisions if:<br>a) noninvasive tests suggest evidence of significant fibrosis<br>b) ALT is persistently elevated<br>c) Age >35 years<br>d) Family history of HCC or cirrhosis. |
| <b>Monitor</b>                          | 1. ALT <ULN                                                                                                                                            | 1. ALT <ULN<br>2. HBV DNA <2000                                                                                                                         | 1. ALT <ULN<br>2. HBV DNA <2000                                                                              |                                                                                                                                                                                                                                                                      |

1  
2  
3  
4  
5  
6  
7  
8  
9  
10  
11  
12  
13  
14  
15  
16  
17  
18  
19  
20  
21  
22  
23  
24  
25  
26  
27  
28  
29  
30  
31  
32  
33  
34  
35  
36  
37  
38  
39  
40  
41  
42  
43  
44  
45  
46  
47

|                                                      |                                   |                                   |                                   |                                   |
|------------------------------------------------------|-----------------------------------|-----------------------------------|-----------------------------------|-----------------------------------|
| <b>Preferred First Line Treatment (Alphabetical)</b> | Entecavir<br>Peg-IFN<br>Tenofovir | Entecavir<br>Peg-IFN<br>Tenofovir | Entecavir<br>Peg-IFN<br>Tenofovir | Entecavir<br>Peg-IFN<br>Tenofovir |
|------------------------------------------------------|-----------------------------------|-----------------------------------|-----------------------------------|-----------------------------------|

HBV DNA in IU/ml; ULN=Upper Limit Normal  
 AASLD ALT ULN in men 35, women 25. EASL/APASL ALT ULN 40, CASL ALT ULN undefined

Confidential



**Table 2:** Treatment Recommendations by Various International Organizations: HBeAg-Negative.

|                                                      | <b>AASLD 2018 (USA)</b>                                                                                                                                                           | <b>EASL 2017 (Europe)</b>                                                                                                                                                                                             | <b>CASL 2012 (Canada)</b>                                                                                                                                      | <b>APASL 2015 (Asia)</b>                                                                                                                                                                                                                                                                                                                |
|------------------------------------------------------|-----------------------------------------------------------------------------------------------------------------------------------------------------------------------------------|-----------------------------------------------------------------------------------------------------------------------------------------------------------------------------------------------------------------------|----------------------------------------------------------------------------------------------------------------------------------------------------------------|-----------------------------------------------------------------------------------------------------------------------------------------------------------------------------------------------------------------------------------------------------------------------------------------------------------------------------------------|
| <b>Treatment Definitely Recommended</b>              | <ol style="list-style-type: none"> <li>ALT &gt;2x ULN and HBV DNA &gt;2000</li> <li>Cirrhosis and HBV DNA &gt;2000</li> </ol>                                                     | <ol style="list-style-type: none"> <li>HBV DNA &gt;2000 and ALT&gt;ULN and/or Liver biopsy showing moderate/severe inflammation/fibrosis</li> <li>HBV DNA &gt;20,000 and ALT &gt;2x ULN</li> <li>Cirrhosis</li> </ol> | <ol style="list-style-type: none"> <li>ALT elevated for 3-6 months and HBV DNA &gt;2000</li> </ol>                                                             | <ol style="list-style-type: none"> <li>ALT &gt;2x ULN and HBV DNA &gt;2000</li> <li>Liver biopsy showing moderate to severe inflammation/significant fibrosis</li> <li>Compensated cirrhosis and HBV DNA &gt;2000</li> <li>Decompensated cirrhosis</li> </ol>                                                                           |
| <b>Treatment Should be Considered</b>                | <ol style="list-style-type: none"> <li>ALT 1-2x ULN</li> <li>HBV DNA &gt;2000</li> <li>Age over 40</li> <li>Liver biopsy showing moderate/severe inflammation/fibrosis</li> </ol> | <ol style="list-style-type: none"> <li>HBV DNA elevated and Age over 30</li> <li>Family history of HCC or cirrhosis and extrahepatic manifestations</li> </ol>                                                        | <ol style="list-style-type: none"> <li>ALT &gt;ULN for 3-6 months or liver biopsy showing moderate/severe inflammation/fibrosis and HBV DNA&gt;2000</li> </ol> | <p>Monitor all non-treated patients every 3 months.</p> <p>Biopsy recommended for treatment decisions if:</p> <ol style="list-style-type: none"> <li>noninvasive tests suggest evidence of significant fibrosis</li> <li>ALT is persistently elevated</li> <li>Age &gt;35 years</li> <li>Family history of HCC or cirrhosis.</li> </ol> |
| <b>Monitor</b>                                       | <ol style="list-style-type: none"> <li>ALT&lt;ULN and HBV DNA &lt;2000</li> </ol>                                                                                                 | <ol style="list-style-type: none"> <li>HBV DNA &lt;2000</li> <li>ALT&lt;ULN</li> </ol>                                                                                                                                | <ol style="list-style-type: none"> <li>ALT&lt;ULN</li> <li>HBV DNA &lt;2000</li> </ol>                                                                         |                                                                                                                                                                                                                                                                                                                                         |
| <b>Preferred First Line Treatment (Alphabetical)</b> | Entecavir<br>PEG-IFN<br>Tenofovir                                                                                                                                                 | Entecavir<br>PEG-IFN<br>Tenofovir                                                                                                                                                                                     | Entecavir<br>PEG-IFN<br>Tenofovir                                                                                                                              | Entecavir<br>PEG-IFN<br>Tenofovir                                                                                                                                                                                                                                                                                                       |

HBV DNA in IU/mL; ULN=Upper Limit Normal

AASLD ALT ULN in men 35, women 19. EASL/APASL ALT ULN 40, CASL ALT ULN undefined

**Table 3:** Criteria for Re-Imbursement of HBV Medications in Canada

| <b>Territory</b>  | <b>Lamivudine</b>                                       | <b>Adefovir</b>                                       | <b>Entecavir</b>                                        | <b>Tenofovir<sup>1</sup></b>                            | <b>Interferon</b>                                                | <b>Emtricitabine/<br/>Tenofovir</b> |
|-------------------|---------------------------------------------------------|-------------------------------------------------------|---------------------------------------------------------|---------------------------------------------------------|------------------------------------------------------------------|-------------------------------------|
| CDEC <sup>2</sup> | N/A <sup>3</sup>                                        | Take with LAM for LAM failure                         | Cirrhosis with DNA >2000 IU/mL                          | Cirrhosis with DNA >2000 IU/mL                          | N/A                                                              | N/A                                 |
| BC                | ALT and viral load requirement OR cirrhosis             | LAM resistance                                        | Cirrhosis and viral load +/- ALT                        | Cirrhosis and viral load +/- ALT OR LAM resistance      | alfa2b HBeAg + with ALT and viral load requirement               | N/A                                 |
| AB                | No restriction for specialists                          | No restriction for specialists                        | No restriction for specialists                          | No restriction for specialists                          | PEG2a<br>No restriction for specialists                          | N/A                                 |
| SK                | No restriction for specialists                          | As per CDEC with specialist consultation              | As per CDEC with specialist consultation                | As per CDEC with specialist consultation                | alfa-2b<br>6 months with specialist consultation                 | N/A                                 |
| MB                | No restriction                                          | N/A                                                   | No restriction                                          | As per CDEC OR Cirrhosis with LAM resistance            | N/A                                                              | N/A                                 |
| ON                | HBV DNA $\geq$ 1000 with ALT >ULN or fibrosis/cirrhosis | N/A                                                   | HBV DNA $\geq$ 1000 with ALT >ULN or fibrosis/cirrhosis | HBV DNA $\geq$ 1000 with ALT >ULN or fibrosis/cirrhosis | alfa2b<br>F3 fibrosis or less, <50 with ALT and DNA requirements | N/A                                 |
| PQ                | No restriction                                          | As per CDEC OR >CP A6 OR post LT with DNA requirement | No restriction                                          | No restriction                                          | PEG2a<br>No restriction                                          | No restriction                      |
| NB                | No restriction for specialists                          | N/A                                                   | No restriction for specialists                          | No restriction for specialists                          | PEG2a<br>HBeAg -, liver inflammation, failed LAM                 | No restriction                      |

|                    |                                        |                                            |                                             |                                             |                                                                                   |                                             |
|--------------------|----------------------------------------|--------------------------------------------|---------------------------------------------|---------------------------------------------|-----------------------------------------------------------------------------------|---------------------------------------------|
| NS                 | No restriction with specialist request | As per CDEC                                | As per CDEC                                 | As per CDEC                                 | N/A                                                                               | N/A                                         |
| PEI                | No restriction                         | As per CDEC                                | As per CDEC                                 | No restriction                              | N/A                                                                               | N/A                                         |
| NL                 | No restriction                         | As per CDEC                                | As per CDEC                                 | As per CDEC                                 | alfa1a/2b<br>HBeAg -, liver inflammation, failed LAM with specialist consultation | N/A                                         |
| YK                 | No restriction                         | As per CDEC with specialist recommendation | Case by case with specialist recommendation | Case by case with specialist recommendation | N/A                                                                               | Case by case with specialist recommendation |
| NIHB               | No restriction                         | As per CDEC                                | As per CDEC                                 | As per CDEC                                 | PEG2a<br>Non-cirrhotic with DNA requirements and specialist request               | No restriction                              |
| Corrections Canada | No restriction                         | No restriction                             | No restriction                              | No restriction                              | PEG2a/2b<br>No restrictions                                                       | No restriction                              |
| Veterans Affairs   | No restriction                         | N/A                                        | N/A                                         | No restriction                              | N/A                                                                               | No restriction                              |

<sup>1</sup>TAF not listed by any program

<sup>2</sup>CDEC = Canadian Drug Expert Committee

<sup>3</sup> N/A: No recommendation or not listed

Telbivudine is not reimbursed by any Canadian public program

**Table 4:** Cost of CHB Treatment in Canada per dose

| <b>Drug</b>                    | <b>BC</b> | <b>AB</b> | <b>SK</b> | <b>MB</b> | <b>ON</b> | <b>PQ</b> | <b>NS</b> | <b>NL</b> | <b>YK</b> |
|--------------------------------|-----------|-----------|-----------|-----------|-----------|-----------|-----------|-----------|-----------|
| <b>Lamivudine</b>              |           |           |           |           |           |           |           |           |           |
| <b>Originator Price</b>        | 5.17      | 4.79      | 4.79      | -         | -         | 4.56      | -         | 5.22      | 4.71      |
| <b>Generic Price</b>           | 3.81      | 3.53      | 3.53      | -         | 3.53      | 3.53      | 3.53      | 3.85      | 3.53      |
| <b>Adefovir</b>                |           |           |           |           |           |           |           |           |           |
| <b>Originator Price</b>        | 26.28     | 23.84     | 24.34     | -         | -         | 23.22     | -         | 26.53     | 24.34     |
| <b>Generic Price</b>           | 20.28     | 18.25     | 18.25     | -         | 20.44     | 18.25     | 20.44     | 22.28     | -         |
| <b>Tenofovir</b>               |           |           |           |           |           |           |           |           |           |
| <b>Originator Price</b>        | -         | 18.49     | 18.77     | 25.51     | 19.55     | 17.29     | -         | 21.34     | 18.77     |
| <b>Generic Price</b>           | 5.28      | 4.89      | 4.89      | 4.89      | 4.89      | 4.89      | 4.89      | 5.33      | 4.89      |
| <b>Entecavir</b>               |           |           |           |           |           |           |           |           |           |
| <b>Originator Price</b>        | 23.76     | 22.00     | 22.00     | -         | -         | 22        | -         | 23.98     | 22.00     |
| <b>Generic Price</b>           | 5.94      | 5.50      | 5.50      | 16.5      | 16.5      | 5.50      | 5.50      | 5.99      | 5.50      |
| <b>Emtricitabine/Tenofovir</b> |           |           |           |           |           |           |           |           |           |
| <b>Originator Price</b>        | -         | -         | 27.70     | 29.21     | 29.21     | 26.10     | 26.10     | 31.84     | 24.83     |
| <b>Generic Price</b>           | -         | -         | 7.30      | 7.30      | 7.30      | 7.30      | 7.30      | 7.96      | -         |
| <b>Interferon</b>              | alfa2b    | PEG2a     | alfa2b    |           | alfa2b    | PEG2a     |           | alfa2b    |           |
| <b>Originator Price</b>        | -         | -         | -         | -         | -         | -         | -         | -         | -         |
| <b>Generic Price</b>           | 135.89    | 407.39    | 125.82    | -         | 145.84    | 395.84    | -         | 659.31    | -         |

BC, ON and NS: Max Price Paid

PEI, NB, NIHB, Corrections Canada and Canadian Pensions Plan do not report cost

alfa2b cost reported as 10 MU dosing

Adefovir: Only Apo generic

Lam: Only Apo generic

TDF: Apo, Teva, Mylan, Auro

NL: Defined cost = list + 8.5%

BC: List price + 5-8%

**Table 5:** Recommendations for a Universal Drug Coverage Strategy

|                     |                                                                                                                                                                                                                                                                                                                                                                                                                    |
|---------------------|--------------------------------------------------------------------------------------------------------------------------------------------------------------------------------------------------------------------------------------------------------------------------------------------------------------------------------------------------------------------------------------------------------------------|
| Tenofovir/Entecavir | <p>Universal coverage who meet standard international criteria for treatment:</p> <p>HBeAg positive: DNA &gt; 20,000 IU/mL and ALT &gt;2 x ULN</p> <p>HBeAg negative: DNA &gt;2000 IU/mL and ALT &gt;2x ULN</p> <p>Cirrhosis/Advanced fibrosis</p> <p>Prophylaxis of maternal transmission with DNA &gt;1 x 10<sup>6</sup> IU/mL</p> <p>Chemotherapy prophylaxis for patients at high risk of HBV reactivation</p> |
| Lamivudine          | Prophylaxis for patients at lower risk of HBV reactivation                                                                                                                                                                                                                                                                                                                                                         |
| Adefovir            | Removal of Adefovir from routine coverage given its increased cost as compared to TDF and ETV along with lower efficacy.                                                                                                                                                                                                                                                                                           |
| PEG-Interferon      | Consider use in HBeAg positive and negative patients                                                                                                                                                                                                                                                                                                                                                               |

**Appendix 1:** Provincial Formulary Databases

| Province | Website                                                                                                                                                                                                                                                                                                                                   | Formulary Update |
|----------|-------------------------------------------------------------------------------------------------------------------------------------------------------------------------------------------------------------------------------------------------------------------------------------------------------------------------------------------|------------------|
| BC       | <a href="https://pharmacareformularysearch.gov.bc.ca/faces/SearchResults.xhtml">https://pharmacareformularysearch.gov.bc.ca/faces/SearchResults.xhtml</a>                                                                                                                                                                                 | 27 Feb 2018      |
| AB       | <a href="https://idbl.ab.bluecross.ca/idbl/load.do">https://idbl.ab.bluecross.ca/idbl/load.do</a>                                                                                                                                                                                                                                         | 12 Mar 2018      |
| SK       | <a href="http://formulary.drugplan.ehealthsask.ca/">http://formulary.drugplan.ehealthsask.ca/</a>                                                                                                                                                                                                                                         | 1 Mar 2018       |
| MB       | <a href="https://www.gov.mb.ca/health/mdbif/index.html">https://www.gov.mb.ca/health/mdbif/index.html</a>                                                                                                                                                                                                                                 | 25 Jan 2018      |
| ON       | <a href="https://www.formulary.health.gov.on.ca/formulary/">https://www.formulary.health.gov.on.ca/formulary/</a>                                                                                                                                                                                                                         | 28 Feb 2018      |
| PQ       | <a href="http://www.ramq.gouv.qc.ca/SiteCollectionDocuments/liste_med/liste_med_2018_03_01_en.pdf">http://www.ramq.gouv.qc.ca/SiteCollectionDocuments/liste_med/liste_med_2018_03_01_en.pdf</a>                                                                                                                                           | 1 Mar 2018       |
| NB       | <a href="http://www2.gnb.ca/content/dam/gnb/Departments/h-s/pdf/en/NBDrugPlan/NewBrunswickDrugPlansFormulary.pdf">http://www2.gnb.ca/content/dam/gnb/Departments/h-s/pdf/en/NBDrugPlan/NewBrunswickDrugPlansFormulary.pdf</a>                                                                                                             | 1 Mar 2018       |
| NS       | <a href="https://novascotia.ca/dhw/pharmacare/documents/formulary.pdf">https://novascotia.ca/dhw/pharmacare/documents/formulary.pdf</a>                                                                                                                                                                                                   | 1 Mar 2018       |
| PEI      | <a href="https://www.princedwardisland.ca/sites/default/files/publications/pei_pharmacare_formulary.pdf">https://www.princedwardisland.ca/sites/default/files/publications/pei_pharmacare_formulary.pdf</a>                                                                                                                               | Feb 2018         |
| NL       | <a href="http://www.health.gov.nl.ca/health/prescription/newformulary.asp">http://www.health.gov.nl.ca/health/prescription/newformulary.asp</a>                                                                                                                                                                                           | 1 Mar 2018       |
| YK       | <a href="http://www.hss.gov.yk.ca/drugformulary.php">http://www.hss.gov.yk.ca/drugformulary.php</a>                                                                                                                                                                                                                                       | 13 Mar 2018      |
| NIHB     | <a href="https://www.canada.ca/content/dam/hc-sc/documents/services/publications/health-system-services/non-insured-health-benefits-drug-benefit-list/dbl-2018-eng.pdf">https://www.canada.ca/content/dam/hc-sc/documents/services/publications/health-system-services/non-insured-health-benefits-drug-benefit-list/dbl-2018-eng.pdf</a> | 8 Mar 2018       |
| VA       | <a href="http://www.veterans.gc.ca/eng/services/health/treatment-benefits/poc/poc10/search">http://www.veterans.gc.ca/eng/services/health/treatment-benefits/poc/poc10/search</a>                                                                                                                                                         | 5 Mar 2018       |

\*Accessed 13 March 2018
